# Supplementary material
Source: publisher figshare collection journal article supplement (https://frontiersin.figshare.com/ndownloader/files/25142339)
Supplement: Supplementary file 1 [file 25142339]

Supplementary Material

# Supplementary Data

**1. The Campanian Ignimbrite stratigraphy**


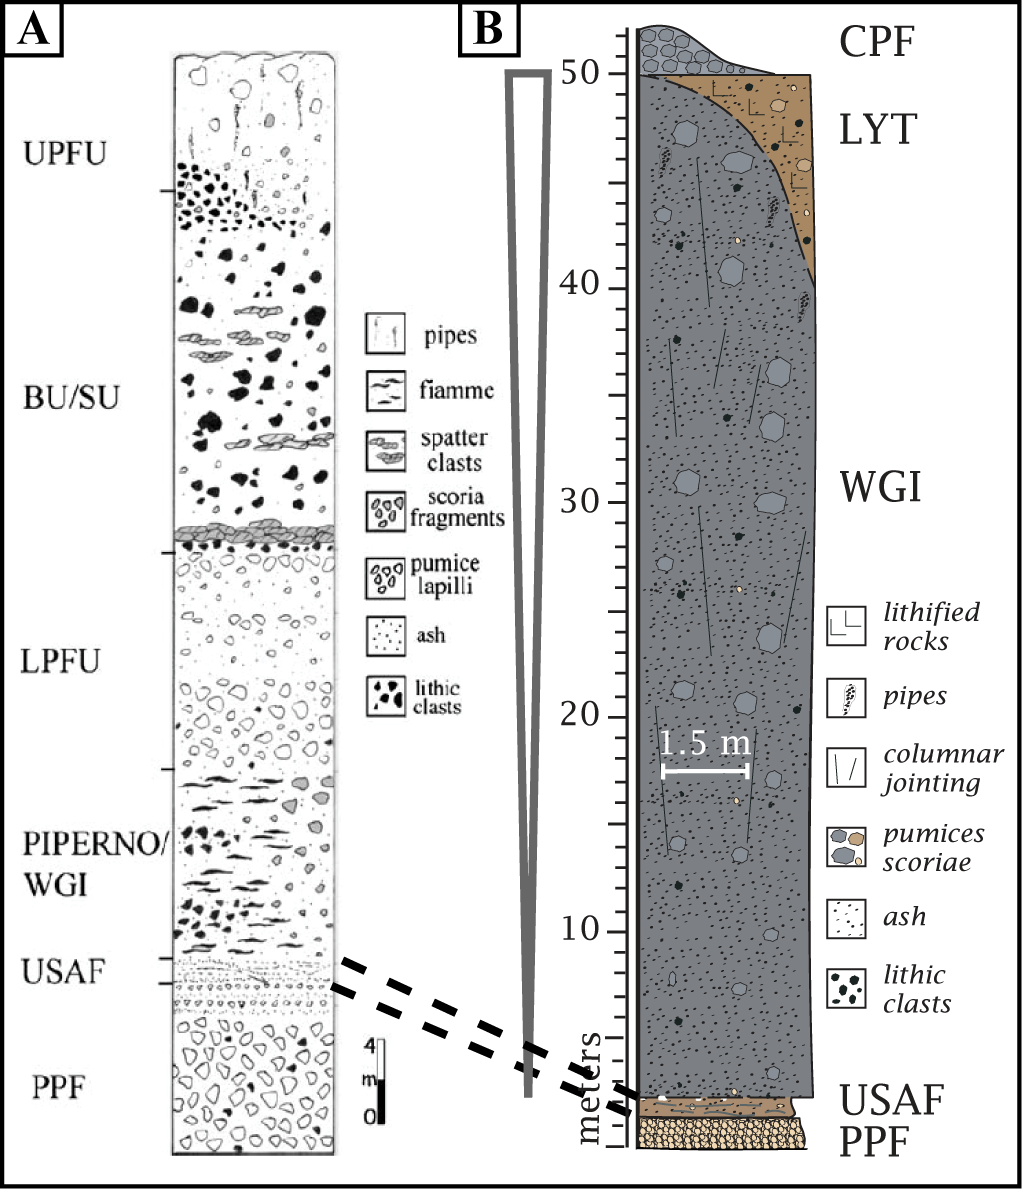


***Figure 1.*** *Reconstructed stratigraphy of CI proximal (Fedele et al., 2008)* ***(A)*** *and distal* ***(B)*** *deposits. BU: Breccia Unit; CPF: Coarse Pumice Flow; LPFU: Lower Pumice Fallout; LYT: Lithified Yellow Tuff; PPF: Plinian Pumice Fallout; SU: Spatter Unit; UPFU: Upper Pumice Flow Unit; USAF: Unconsolidated Stratified Ash Flow; WGI: Welded Gray Ignimbrite.*

**2. Literature and field data**

Data from literature inserted into the GIS database are reported in Table 1. Moreover, other papers were used for geological sketches, proximal area isopach maps and isopleths maps (Ortolani and Aprile, 1985; Incoronato and Nardi, 1987; Scandone et al., 1991; Bellucci, 1994; Signorelli et al., 1999; Fedele et al., 2002; Aprile et al., 2004; Fowler et al., 2007; Milia and Torrente, 2007; Giaccio et al., 2008; Pappalardo et al., 2008; Arienzo et al., 2009, 2011; de Vivo et al., 2010; Fedele et al., 2016; Scarpati and Perrotta, 2016; Smith et al., 2016). Outcrops location are reported in Table 2.

| **ID** | **Paper** | **Latitude (°)** | **Longitude (°)** | **Thickness (m)** | **Name** |
| --- | --- | --- | --- | --- | --- |
| 1 | Barberi et al. (1978) | 41.05698 | 14.33346 | 14.9 | S. Nicola La Strada |
| 2 | Barberi et al. (1978) | 41.05573 | 14.70687 | 15.5 | Tufara |
| 3 | Barberi et al. (1978) | 40.94861 | 14.56534 | 41.0 | Tufino |
| 4 | Cappelletti et al. (2003) | 41.06165 | 14.42083 | 7.0 | Balzarama |
| 5 | Cappelletti et al. (2003) | 41.11082 | 14.47346 | 8.3 | Dugenta |
| 6 | Cappelletti et al. (2003) | 40.94280 | 14.60260 | 12.1 | La schiava |
| 7 | Cappelletti et al. (2003) | 41.23293 | 14.50691 | 4.3 | Faicchio |
| 8 | Cappelletti et al. (2003) | 40.77209 | 14.66155 | 20.9 | Castel San Giorgio |
| 9 | Cappelletti et al. (2003) | 40.95816 | 15.00003 | 7.1 | San Mango S. C. |
| 10 | De Vivo et al. (2001) | 40.94472 | 14.16421 | 19.6 | Giugliano |
| 11 | De Vivo et al. (2001) | 40,93534 | 14,56743 | 3.8 | Taurano |
| 12 | De Vivo et al. (2001) | 41.17565 | 14.49265 | 10.1 | Sant'Agata dei Goti |
| 13 | De Vivo et al. (2001) | 41.06337 | 14.70339 | 10.6 | Altavilla |
| 14 | De Vivo et al. (2001) | 40.97126 | 14.54410 | 10.7 | Tufino |
| 15 | De Vivo et al. (2001) | 40.95244 | 14.55400 | 10.1 | Sperone |
| 16 | De Vivo et al. (2001) | 40.87905 | 14.29606 | 8.9 | Ponti Rossi |
| 17 | De Vivo et al. (2001) | 40.88207 | 14.31975 | 5.1 | Poggioreale |
| 18 | De Vivo et al. (2001) | 40.79846 | 14.04573 | 9.0 | Monte di Procida |
| 19 | De Vivo et al. (2001) | 40.62828 | 14.37821 | 10.3 | Sant'Agnello |
| 20 | De Vivo et al. (2001) | 40.87633 | 14.34249 | 6.8 | Arpino |
| 21 | De Vivo et al. (2001) | 40.54981 | 14.23133 | 10.4 | Capri |
| 22 | L. Fedele et al. (2008) | 40.76367 | 14.03370 | 9.8 | Punta della lingua |
| 23 | L. Fedele et al. (2008) | 40.76784 | 14.01611 | 27.0 | Scotto di Carlo |
| 24 | L. Fedele et al. (2008) | 40.79131 | 14.05739 | 25.7 | Monte di Procida |
| 25 | L. Fedele et al. (2008) | 40.84665 | 14.05135 | 10.2 | Cuma |
| 26 | L. Fedele et al. (2008) | 40.89064 | 14.07671 | 6.0 | San Severino |
| 27 | L. Fedele et al. (2008) | 40.88900 | 14.10608 | 17.0 | Spinelli |
| 28 | L. Fedele et al. (2008) | 40.90952 | 14.09640 | 14.0 | Zaccaria |
| 29 | L. Fedele et al. (2008) | 40.92155 | 14.11957 | 24.0 | Qualiano |
| 30 | L. Fedele et al. (2008) | 40.90092 | 14.14108 | 18.9 | Punta Marmolite |
| 31 | L. Fedele et al. (2008) | 40.88169 | 14.16774 | 5.1 | Quarto |
| 32 | L. Fedele et al. (2008) | 40.85687 | 14.18742 | 72.0 | Camaldoli |
| 33 | L. Fedele et al. (2008) | 40.84269 | 14.22948 | 7.4 | San Martino Hill |
| 34 | L. Fedele et al. (2008) | 40.85087 | 14.23347 | 9.1 | Montesanto |
| 35 | L. Fedele et al. (2008) | 40.86016 | 14.22790 | 6.1 | Fontanelle |
| 36 | L. Fedele et al. (2008) | 40.87866 | 14.25874 | 4.5 | Ponti Rossi |
| 37 | L. Fedele et al. (2008) | 40.88394 | 14.27807 | 14.0 | Santa Maria del pianto |
| 38 | Giaccio et al. (2006) | 40.86797 | 14.85653 | 13.1 | Serino |
| 39 | Langella et al. (2013) | 40.88284 | 14.66613 | 3.6 | Moschiano |
| 40 | Langella et al. (2013) | 41.06646 | 14.71668 | 3.7 | Tufara |
| 41 | Langella et al. (2013) | 40.70136 | 14.62501 | 8.8 | Pucara |
| 42 | Langella et al. (2013) | 40.69312 | 14.83241 | 8.2 | Torrente Sordina |
| 43 | Langella et al. (2013) | 41.36129 | 13.86913 | 7.2 | Mortola |
| 44 | Langella et al. (2013) | 40.60310 | 14.35675 | 2.4 | Monticchio |
| 45 | Langella et al. (2013) | 41.12660 | 14.45214 | 8.2 | Dugenta |
| 46 | Langella et al. (2013) | 41.07085 | 14.39716 | 6.5 | Balzarama |
| 47 | Langella et al. (2013) | 41.04894 | 14.38355 | 11.6 | Maddaloni |
| 48 | Langella et al. (2013) | 41.01588 | 14.75955 | 12.1 | Altavilla |
| 49 | Langella et al. (2013) | 40.95232 | 14.58959 | 12.0 | La schiava |
| 50 | Langella et al. (2013) | 41.09617 | 14.45043 | 3.9 | S. Agata dei Goti |
| 51 | Melluso et al. (1995) | 40.84929 | 14.04881 | 15.6 | Cuma |
| 52 | Melluso et al. (1995) | 40.79063 | 14.04569 | 20.1 | Marina di Vitafumo |
| 53 | Melluso et al. (1995) | 40.76432 | 14.03661 | 13.5 | Punta della lingua |
| 54 | Melluso et al. (1995) | 40.76609 | 14.02101 | 23.6 | Scotto di Carlo |
| 55 | Melluso et al. (1995) | 40.76252 | 14.00877 | 10.1 | Cimitero |
| 56 | Milia et al. (2003) | 40.77427 | 14.43946 | 25.2 | Trecase |
| 57 | Orsi and Rosi (1991) | 40.89444 | 14.13328 | 16.0 | Punta Marmolite |
| 58 | Orsi and Rosi (1991) | 40.84473 | 14.04803 | 13.7 | Cuma |
| 59 | Orsi and Rosi (1991) | 40.79548 | 14.04394 | 9.7 | Monte di Procida |
| 60 | Orsi and Rosi (1991) | 40.71367 | 13.95586 | 1.3 | Ischia grotte di terra |
| 61 | Orsi and Rosi (1991) | 40.74482 | 13.99483 | 5.3 | Vivara |
| 62 | Orsi and Rosi (1991) | 40.76353 | 14.01032 | 10.2 | Procida Pozzo vecchio |
| 63 | Orsi and Rosi (1991) | 40.76622 | 14.02152 | 19.8 | Procida scoglio cannone |
| 64 | Orsi and Rosi (1991) | 40.76470 | 14.03672 | 17.2 | Procida Punta della lingua |
| 65 | Orsi and Rosi (1991) | 40.78996 | 14.04678 | 28.5 | Marina di Vitafumo |
| 66 | Orsi and Rosi (1991) | 40.80904 | 14.04393 | 19.5 | Torregaveta |
| 67 | Orsi and Rosi (1991) | 40.87962 | 14.07540 | 5.6 | San Severino |
| 68 | Orsi and Rosi (1991) | 40.85386 | 14.19331 | 79.2 | Camaldoli |
| 69 | Orsi and Rosi (1991) | 40.95268 | 14.11209 | 30.4 | Scarafea |
| 70 | Orsi and Rosi (1991) | 40.87458 | 14.26099 | 8.0 | Ponti Rossi |
| 71 | Orsi and Rosi (1991) | 40.65581 | 14.43023 | 7.6 | Vico Equense |
| 72 | Orsi and Rosi (1991) | 40.92946 | 14.70306 | 0.7 | Acqua Fidia |
| 73 | Orsi and Rosi (1991) | 41.26809 | 14.03841 | 1.6 | Furnolo |
| 74 | Orsi and Rosi (1991) | 41.12338 | 13.90684 | 2.6 | Mondragone |
| 75 | Orsi and Rosi (1991) | 40.71908 | 14.78138 | 0.3 | Pellezzano |
| 76 | Orsi and Rosi (1991) | 41.29998 | 13.99325 | 0.9 | Roccamonfina |
| 77 | Orsi and Rosi (1991) | 41.22075 | 14.12802 | 0.8 | Visciano |
| 78 | Orsi and Rosi (1991) | 41.27260 | 14.52178 | 8.6 | Massa |
| 79 | Orsi et al. (1996) | 40.85020 | 14.20771 | 80.0 | Verdolino Valley |
| 80 | Orsi et al. (1996) | 40.84979 | 14.19188 | 80.0 | Torre di Franco |
| 81 | Orsi et al. (1996) | 40.87559 | 14.31236 | 26.0 | 66 |
| 82 | Orsi et al. (1996) | 40.87037 | 14.30095 | 15.3 | 67 |
| 83 | Orsi et al. (1996) | 40.87446 | 14.29572 | 48.1 | 4 |
| 84 | Orsi et al. (1996) | 40.87704 | 14.29033 | 8.9 | 61 |
| 85 | Orsi et al. (1996) | 40.88727 | 14.29953 | 12.4 | 65 |
| 86 | Orsi et al. (1996) | 40.87741 | 14.26781 | 30.0 | 51 |
| 87 | Orsi et al. (1996) | 40.87480 | 14.24930 | 33.0 | 46 |
| 88 | Orsi et al. (1996) | 40.87765 | 14.22415 | 33.1 | 36 |
| 89 | Orsi et al. (1996) | 40.90006 | 14.22256 | 28.9 | 34 |
| 90 | Orsi et al. (1996) | 40.90738 | 14.24090 | 8.6 | 44 |
| 91 | Orsi et al. (1996) | 40.90336 | 14.26784 | 57.2 | 49 |
| 92 | Orsi et al. (1996) | 40.84838 | 14.05607 | 15.0 | Cuma |
| 93 | Orsi et al. (1996) | 40.86702 | 14.26767 | 6.0 | Ponti Rossi |
| 94 | Orsi et al. (1996) | 40.87882 | 14.08267 | 17.0 | San Severino |
| 95 | Orsi et al. (1996) | 40.86954 | 14.30927 | 4.0 | Sant'Arpino |
| 96 | Orsi et al. (1996) | 40.88741 | 14.15640 | 18.2 | Trefola |
| 97 | Ort et al. (2003) | 41.01429 | 14.76629 | 34.8 | Altavilla |
| 98 | Ort et al. (2003) | 41.27794 | 14.53083 | 12.5 | Massa |
| 99 | Ort et al. (2003) | 41.13269 | 13.89663 | 6.1 | Mondragone |
| 100 | Pappalardo et al. (2002) | 40.87216 | 14.26782 | 30.1 | Ponti Rossi |
| 101 | Perrotta et al. (2006) | 40.83247 | 14.24658 | 0.0 | 8 |
| 102 | Perrotta et al. (2006) | 40.83744 | 14.22889 | 0.0 | 1 |
| 103 | Perrotta et al. (2006) | 40.83885 | 14.23355 | 0.0 | 2 |
| 104 | Perrotta et al. (2006) | 40.84008 | 14.23731 | 0.0 | 3 |
| 105 | Perrotta et al. (2006) | 40.84207 | 14.24123 | 14.4 | 4 |
| 106 | Perrotta et al. (2006) | 40.84634 | 14.24016 | 15.5 | 5 |
| 107 | Perrotta et al. (2006) | 40.86076 | 14.23170 | 6.2 | 6 |
| 108 | Perrotta et al. (2006) | 40.85981 | 14.23585 | 2.0 | I |
| 109 | Perrotta et al. (2006) | 40.83756 | 14.24999 | 10.0 | II |
| 110 | Perrotta et al. (2006) | 40.83270 | 14.24157 | 21.7 | III |
| 111 | Perrotta et al. (2010) | 40.81133 | 14.07042 | 0.0 | 10 |
| 112 | Perrotta et al. (2010) | 40.80816 | 14.04338 | 5.6 | 11 |
| 113 | Perrotta et al. (2010) | 40.79909 | 14.03731 | 5.6 | 12 |
| 114 | Perrotta et al. (2010) | 40.79504 | 14.04368 | 5.6 | 13 |
| 115 | Perrotta et al. (2010) | 40.78831 | 14.05603 | 2.9 | 14 |
| 116 | Perrotta et al. (2010) | 40.78932 | 14.06303 | 0.9 | 15 |
| 117 | Perrotta et al. (2010) | 40.75982 | 14.02430 | 7.4 | 1 |
| 118 | Perrotta et al. (2010) | 40.75991 | 14.03198 | 0.0 | 2 |
| 119 | Perrotta et al. (2010) | 40.76759 | 14.01905 | 26.3 | 3 |
| 120 | Perrotta et al. (2010) | 40.76807 | 14.00989 | 0.0 | 4 |
| 121 | Perrotta et al. (2010) | 40.76457 | 14.01012 | 9.2 | 5 |
| 122 | Perrotta et al. (2010) | 40.76275 | 14.00877 | 9.8 | 6 |
| 123 | Perrotta et al. (2010) | 40.76039 | 14.00850 | 3.0 | 7 |
| 124 | Perrotta et al. (2010) | 40.75873 | 14.00936 | 5.2 | 8 |
| 125 | Perrotta et al. (2010) | 40.74480 | 13.99123 | 2.1 | 9 |
| 126 | Rolandi et al. (2003) | 41.05877 | 14.42550 | 3.1 | Maddaloni |
| 127 | Rolandi et al. (2003) | 41.06104 | 14.46361 | 14.7 | Durazzano |
| 128 | Rolandi et al. (2003) | 40.89955 | 14.65636 | 4.9 | Taurano |
| 129 | Rolandi et al. (2003) | 40.88146 | 14.68907 | 11.1 | Moschiano |
| 130 | Rolandi et al. (2003) | 40.81916 | 14.67199 | 18.8 | Sarno |
| 131 | Rolandi et al. (2003) | 40.80551 | 14.70470 | 7.7 | Siano |
| 132 | Rolandi et al. (2003) | 40.78712 | 14.70638 | 34.4 | Castel San Giorgio |
| 133 | Rolandi et al. (2003) | 40.66237 | 14.44305 | 15.5 | Seiano Valley |
| 134 | Rolandi et al. (2003) | 40.62574 | 14.41407 | 9.9 | Piano di Sorrento |
| 135 | Rolandi et al. (2003) | 40.76290 | 14.03357 | 20.5 | Punta della lingua |
| 136 | Rolandi et al. (2003) | 40.79092 | 14.04556 | 22.0 | Marina di Vitafumo |
| 137 | Rolandi et al. (2003) | 40.81290 | 14.04381 | 27.5 | Torregaveta |
| 138 | Rolandi et al. (2003) | 40.78915 | 14.06432 | 3.0 | Miliscola |
| 139 | Rolandi et al. (2003) | 40.84768 | 14.05100 | 15.4 | Cuma |
| 140 | Rolandi et al. (2003) | 40.89771 | 14.14052 | 13.8 | Punta Marmolite |
| 141 | Rolandi et al. (2003) | 40.85252 | 14.19673 | 58.2 | Camaldoli |
| 142 | Rolandi et al. (2003) | 40.84307 | 14.21673 | 162.0 | Vomero |
| 143 | Rolandi et al. (2003) | 40.84287 | 14.24107 | 17.8 | San Martino |
| 144 | Rolandi et al. (2003) | 40.86743 | 14.27793 | 27.1 | Ponti Rossi |
| 145 | Rolandi et al. (2003) | 40.87120 | 14.29386 | 26.3 | Poggioreale |
| 146 | Rolandi et al. (2003) | 40.87720 | 14.31490 | 5.2 | Arpino |
| 147 | Rolandi et al. (2003) | 40.83655 | 14.25039 | 43.0 | Palazzo Reale |
| 148 | Rolandi et al. (2003) | 40.78112 | 14.44386 | 50.0 | Trecase |
| 149 | Rosi et al. (1988) | 40.71199 | 13.96250 | 0.7 | Grotta di Terra |
| 150 | Rosi et al. (1988) | 40.79707 | 14.04236 | 12.6 | Monte di Procida - 6 |
| 151 | Rosi et al. (1988) | 40.78973 | 14.05386 | 5.3 | Monte di Procida - 5 |
| 152 | Rosi et al. (1988) | 40.74315 | 13.99227 | 1.6 | Vivara - 2 |
| 153 | Rosi et al. (1988) | 40.76072 | 14.00861 | 5.0 | Procida - 3 |
| 154 | Rosi et al. (1988) | 40.76522 | 14.01056 | 11.7 | Procida - 4 |
| 155 | Rosi et al. (1996) | 40.71287 | 13.95659 | 1.3 | Ischia grotte di terra |
| 156 | Rosi et al. (1996) | 40.74326 | 13.99649 | 5.5 | Vivara |
| 157 | Rosi et al. (1996) | 40.76308 | 14.01249 | 11.0 | Pozzo vecchio |
| 158 | Rosi et al. (1996) | 40.76653 | 14.02035 | 20.4 | Scoglio cannone |
| 159 | Rosi et al. (1996) | 40.76444 | 14.03693 | 16.8 | Punta della lingua |
| 160 | Rosi et al. (1996) | 40.78999 | 14.04661 | 26.6 | Vitafumo |
| 161 | Rosi et al. (1996) | 40.81117 | 14.04389 | 21.0 | Torregaveta |
| 162 | Rosi et al. (1996) | 40.84822 | 14.04739 | 15.1 | Cuma |
| 163 | Rosi et al. (1996) | 40.88104 | 14.07809 | 5.2 | San Severino |
| 164 | Rosi et al. (1996) | 40.89488 | 14.13404 | 21.5 | Punta Marmolite |
| 165 | Rosi et al. (1996) | 40.85590 | 14.19588 | 77.2 | Camaldoli |
| 166 | Rosi et al. (1996) | 40.95234 | 14.11780 | 26.3 | Scarafea |
| 167 | Rosi et al. (1996) | 40.87618 | 14.26290 | 7.4 | Ponti Rossi |
| 169 | Rosi and Sbrana (1987) | 40.85786 | 14.19574 | 25.0 | Camaldoli |
| 170 | Rosi and Sbrana (1987) | 40.90527 | 14.14250 | 13.0 | Punta Marmolite |
| 171 | Rosi and Sbrana (1987) | 40.88230 | 14.06558 | 1.1 | San Severino |
| 172 | Sparice (2015) | 41.40636 | 13.98329 | 10.3 | Mignano Monte Lungo |
| 173 | Sparice (2015) | 41.28622 | 13.99279 | 4.3 | Roccamonfina |
| 174 | Sparice (2015) | 41.26915 | 14.03347 | 10.0 | Furnolo |
| 175 | Sparice (2015) | 41.18818 | 13.97548 | 10.0 | Carinola |
| 176 | Sparice (2015) | 41.12329 | 13.90834 | 4.9 | Mondragone |
| 177 | Sparice (2015) | 41.13758 | 14.25327 | 7.1 | Triflisco |
| 178 | Sparice (2015) | 41.16939 | 14.26525 | 8.0 | Casella1 |
| 179 | Sparice (2015) | 41.19606 | 14.23739 | 3.0 | Casella2 |
| 180 | Sparice (2015) | 41.20890 | 14.40448 | 5.0 | Ruviano |
| 181 | Sparice (2015) | 41.27236 | 14.46645 | 8.2 | Faicchio |
| 182 | Sparice (2015) | 41.27024 | 14.51387 | 3.2 | S. Lorenzello I |
| 183 | Sparice (2015) | 41.26833 | 14.53105 | 8.2 | San Lorenzello II |
| 184 | Sparice (2015) | 41.12278 | 14.43879 | 8.2 | Dugenta |
| 185 | Sparice (2015) | 41.09454 | 14.48905 | 20.5 | S. Agata dei Goti |
| 186 | Sparice (2015) | 41.08609 | 14.54280 | 4.5 | Moiano |
| 187 | Sparice (2015) | 41.12554 | 14.62174 | 21.0 | Tocco Claudio |
| 188 | Sparice (2015) | 41.02847 | 14.69167 | 4.6 | Roccabascerana |
| 189 | Sparice (2015) | 41.05333 | 14.71525 | 3.6 | Tufara |
| 190 | Sparice (2015) | 41.06472 | 14.88412 | 1.0 | Poeti |
| 191 | Sparice (2015) | 41.00583 | 14.76202 | 20.4 | Altavilla Irpina |
| 192 | Sparice (2015) | 41.06822 | 15.04053 | 3.0 | Grottaminarda |
| 193 | Sparice (2015) | 40.97184 | 14.96672 | 8.5 | S. Mango sul calore |
| 194 | Sparice (2015) | 40.93227 | 14.70449 | 1.1 | Acqua Fidia |
| 195 | Sparice (2015) | 40.91711 | 14.67449 | 6.6 | Monteforte Irpino 1 |
| 196 | Sparice (2015) | 40.89668 | 14.66921 | 6.6 | Monteforte Irpino 2 |
| 197 | Sparice (2015) | 40.87410 | 14.67623 | 1.7 | Monteforte irpino 3 |
| 198 | Sparice (2015) | 40.89039 | 14.63113 | 5.0 | Visciano 1 |
| 199 | Sparice (2015) | 40.90129 | 14.62203 | 5.0 | Visciano2 |
| 200 | Sparice (2015) | 40.86459 | 14.70745 | 4.7 | Moschiano |
| 201 | Sparice (2015) | 40.87153 | 14.82712 | 0.7 | Aiello sul sabato |
| 202 | Sparice (2015) | 40.83936 | 14.89030 | 4.3 | Serino |
| 203 | Sparice (2015) | 40.82302 | 14.91053 | 7.0 | Sala |
| 204 | Sparice (2015) | 40.81967 | 14.81731 | 0.5 | Montoro superiore |
| 205 | Sparice (2015) | 40.75354 | 14.80000 | 1.5 | Penta |
| 206 | Sparice (2015) | 40.77694 | 14.65092 | 1.9 | S.Anna |
| 207 | Sparice (2015) | 40.73088 | 14.70338 | 0.5 | S.Lucia |
| 208 | Sparice (2015) | 40.71625 | 14.77207 | 5.1 | Cologna |
| 209 | Sparice (2015) | 40.69339 | 14.88640 | 6.9 | Fosso di Prepezzano |
| 210 | Sparice (2015) | 40.67902 | 14.85191 | 16.1 | Sordina |
| 211 | Sparice (2015) | 40.69618 | 14.63176 | 4.6 | Polvica |
| 212 | Sparice (2015) | 40.67848 | 14.63972 | 10.7 | Paterno S. Arcangelo |
| 213 | Sparice (2015) | 40.63868 | 14.40205 | 20.7 | Piano di Sorrento |
| 214 | Sparice (2015) | 40.61669 | 14.38275 | 1.6 | Cesarano |
| 215 | Sparice (2015) | 40.59932 | 14.35159 | 3.4 | Monticchio |
| 216 | Aprile and Toccaceli (2002) | 40.81330 | 14.61202 | 24.3 | Pozzo SSLM6 |
| 217 | Aiello et al. (2018) | 41.112175 | 13.904175 | 16.9 | LV4 |
| 218 | Costanzo and Nunziata (2019) | 40.83715 | 14.25036 | 10.0 | S97 |
| 219 | Costanzo and Nunziata (2019) | 40.84192 | 14.24980 | 4.9 | S95 |
| 220 | Nunziata et al. (2004) | 40.86762 | 14.30477 | 16.1 | Site 2 - S67 |
| 221 | Nunziata et al. (2004) | 40.87512 | 14.27622 | 8.0 | Site 3 |
| 222 | Torrente et al. (2010) | 40.93713 | 14.11618 | 75.6 | 16 |
| 223 | Torrente et al. (2010) | 40.82895 | 14.22241 | 18.7 | 67 |
| 224 | Torrente et al. (2010) | 40.82960 | 14.24913 | 83.5 | 75 |
| 225 | Torrente et al. (2010) | 40.83690 | 14.25605 | 42.9 | 78 |
| 226 | Torrente et al. (2010) | 40.84064 | 14.24542 | 13.6 | 81b |
| 227 | Torrente et al. (2010) | 40.84729 | 14.24480 | 13.9 | 81c |
| 228 | Torrente et al. (2010) | 40.85683 | 14.27695 | 29.7 | 100 |
| 229 | Torrente et al. (2010) | 40.86468 | 14.29650 | 24.7 | 103 |
| 230 | Torrente et al. (2010) | 40.87460 | 14.29625 | 39.8 | 110 |
| 231 | Torrente et al. (2010) | 40.88993 | 14.28339 | 39.2 | 114 |
| 232 | Torrente et al. (2010) | 40.90919 | 14.31455 | 60.8 | 118 |
| 233 | Torrente et al. (2010) | 40.89068 | 14.33805 | 16.1 | 141 |
| 234 | Torrente et al. (2010) | 40.87740 | 14.21536 | 107.4 | 590 |
| 235 | Torrente et al. (2010) | 40.84317 | 14.22551 | 79.6 | 665 |
| 236 | Torrente et al. (2010) | 40.85645 | 14.23688 | 64.0 | 667 |
| 237 | Torrente et al. (2010) | 40.89704 | 14.29650 | 50.3 | 1021 |
| 238 | Torrente et al. (2010) | 40.98579 | 14.17752 | 37.0 | T163 |

***Table 1.*** *Outcrops used in the GIS database, the relative coordinates were taken from the papers or from the georeferenced map, produced during this work.*

| **ID** | **Site name** | **Latitude (°)** | **Longitude (°)** | **Altitude (m) a.s.l.** | **Units** | **Observed Thickness (m)** |
| --- | --- | --- | --- | --- | --- | --- |
| 1 | Stop 1 - Mignano Montelungo | 41.40661 | 13.98082 | 95 | WGI | 8 |
| 2 | Stop 2 - Mignano Montelungo | 41.40628 | 13.98121 | 100 | USAF, WGI | 1 |
| 3 | Stop 3 - Mignano Montelungo | 41.40629 | 13.98113 | 110 | USAF, WGI | 1 |
| 4 | Stop 4 - Roccamonfina | 41.28944 | 13.99278 | 540 | GL, USAF, WGI | 50 |
| 5 | Stop 5 - Roccamonfina | 41.28952 | 13.99265 | 560 | WGI | 4 |
| 6 | Stop 6 - Sessa Aurunca | 41.24711 | 13.93903 | 185 | WGI | 12 |
| 7 | Ponte Sant'Agata | 41.22863 | 13.93258 | 139 | WGI | 30 |
| 8 | SP14 | 41.27269 | 13.9621 | 545 | WGI | 25 |
| 9 | Stop 7 - Tavola | 41.29957 | 14.00002 | 610 | USAF, WGI | 2 |
| 10 | Stop 8 - Torano A | 41.27172 | 13.99416 | 440 | WGI | 1 |
| 11 | Stop 8 - Torano B | 41.269 | 14.04052 | 461 | GL, USAF, WGI | 30 |
| 12 | Stop 9 - Furnolo | 41.27165 | 13.99404 | 301 | GL, USAF, WGI | 2 |
| 13 | Stop 10 - Furnolo | 41.26993 | 14.0419 | 300 | WGI | 35 |
| 14 | Comune Mignano Montelungo | 41.40541 | 13.98322 | 130 | WGI | 6 |
| 15 | Stop 11 - Sant'Angelo in Formis | 41.12139 | 14.25682 | 57 | USAF, WGI | 15 |
| 16 | Stop 12 - Triflisco | 41.1362 | 14.25528 | 34 | WGI | 5 |
| 17 | Stop 13 - Pontelatone A | 41.18584 | 14.25546 | 83 | WGI | 1 |
| 18 | Stop 13 - Pontelatone B | 41.1854 | 14.25557 | 81 | WGI | 5 |
| 19 | Stop 14 - Pontelatone | 41.18474 | 14.2553 | 78 | USAF, WGI | 5 |
| 20 | Stop 15 - Pontelatone SP189 | 41.1906 | 14.25493 | 98 | WGI | 7 |
| 21 | Stop 16 - Ruviano | 41.20994 | 14.4079 | 78 | WGI | 2 |
| 22 | Stop 17 - Ruviano | 41.20936 | 14.40745 | 70 | WGI | 21 |
| 23 | Stop 18 - San Salvatore Telesino | 41.23581 | 14.47714 | 104 | WGI | 2 |
| 24 | Stop 19 - Puglianello | 41.22433 | 14.4464 | 62 | WGI | 3 |
| 25 | Telese terme | 41.22982 | 14.53457 | 116 | WGI | 2 |
| 26 | Ruviano 1 | 41.21043 | 14.41082 | 57 | WGI | 5 |
| 27 | Ruviano Fosso | 41.21167 | 14.41127 | 63 | WGI | 8 |
| 28 | Ruviano 2 | 41.21055 | 14.41012 | 64 | WGI | 3 |
| 29 | Stop 20 - San Lorenzello | 41.26985 | 14.53162 | 190 | USAF, WGI | 19 |
| 30 | Stop 21 - San Lorenzello | 41.2692 | 14.53801 | 214 | WGI | 9 |
| 31 | Stop 22 - Amorosi | 41.20903 | 14.45779 | 60 | WGI | 2 |
| 32 | Stop 23 - Casagiove | 41.08671 | 14.30732 | 67 | WGI | 7 |
| 33 | San Lorenzello | 41.26818 | 14.53105 | 196 | WGI | 15 |
| 34 | San Lorenzello - Cerreto | 41.27637 | 14.55113 | 232 | WGI | 5 |
| 35 | San Lorenzello Ristorante | 41.2685 | 14.52962 | 191 | WGI | 10 |
| 36 | Stop 24 - Casagiove | 41.08662 | 14.30278 | 65 | WGI | 14 |
| 37 | Stop 25 - Gradillo | 41.12394 | 14.33669 | 166 | WGI | 24 |
| 38 | Casagiove SS700 | 41.08747 | 14.30406 | 74 | WGI | 6 |
| 39 | Gradillo | 41.12054 | 14.33908 | 193 | WGI | 2 |
| 40 | Ruviano 3 | 41.20775 | 14.40391 | 75 | WGI | 3 |
| 41 | Ruviano 4 | 41.20849 | 14.40651 | 70 | WGI | 13 |
| 42 | Ruviano 5 | 41.21053 | 14.41048 | 57 | WGI | 11 |
| 43 | Ruviano - Cimitero | 41.21192 | 14.42011 | 60 | WGI | 1 |
| 44 | Ruviano 6 | 41.21258 | 14.42225 | 60 | WGI | 3 |
| 45 | Stop 26 - Maddaloni | 41.04716 | 14.37956 | 62 | LYT | 1 |
| 46 | Cava abbandonata | 41.06373 | 14.34691 | 56 | LYT | 5 |
| 47 | Stop 27 - Caserta | 41.06161 | 14.3455 | 53 | LYT | 4 |
| 48 | Stop 28 - Sant'Anna | 41.09116 | 14.44714 | 62 | LYT | 15 |
| 49 | SP121 | 41.09902 | 14.46894 | 84 | LYT | 20 |
| 50 | Stop 29 - Capellino | 41.09769 | 14.48696 | 112 | LYT | 53 |
| 51 | Ponte Sant'Agata dei Goti | 41.08902 | 14.50297 | 148 | WGI | 40 |
| 52 | Stop 30 - Durazzano | 41.06417 | 14.45702 | 264 | WGI | 3 |
| 53 | Sant'Agata dei Goti top | 41.10065 | 14.50719 | 142 | WGI | 0 |
| 54 | Stop 31 - San Pietro | 41.09956 | 14.50764 | 126 | WGI | 43 |
| 55 | Stop 32 - Castrone | 41.09163 | 14.51141 | 147 | LYT | 3 |
| 56 | Stop 33 - Sant'Agata dei Goti | 41.09217 | 14.50656 | 107 | USAF, GL, WGI | 35 |
| 57 | Stop 34 - Sant'Agata dei Goti | 41.09167 | 14.50894 | 123 | WGI, LYT | 35 |
| 58 | SP121 bis | 41.10215 | 14.46956 | 84 | LYT | 2 |
| 59 | Stop 35 - Tocco Caudio | 41.12213 | 14.62599 | 485 | LYT | 1 |
| 60 | Stop 36 - Tufara | 41.05936 | 14.71026 | 198 | PPF, WGI | 20 |
| 61 | Stop 37 - Altavilla Irpina B | 41.00774 | 14.76531 | 260 | LYT | 20 |
| 62 | Stop 37 - Altavilla Irpina A | 41.00714 | 14.76552 | 244 | PPF, GL, USAF, WGI, LYT | 5 |
| 63 | Lungofiume - Altavilla Irpina | 41.00604 | 14.76601 | 222 | WGI, LYT | 14 |
| 64 | Stop 38 - Monteforte Irpino | 40.91418 | 14.67142 | 444 | LYT | 14 |
| 65 | Stop 39 - Verdolino | 40.85522 | 14.20769 | 153 | PP, BM | 50 |
| 66 | Stop 40 - Monte di Procida | 40.791 | 14.04602 | 0 | PP, BM | 3 |
| 67 | Stop 41 - Mondragone | 41.12515 | 13.91096 | 30 | WGI | 80 |
| 68 | SS430 A | 41.31125 | 13.89634 | 19 | WGI | 12 |
| 69 | SS430 B | 41.30749 | 13.89466 | 18 | WGI | 12 |
| 70 | Stop 42 - Mortola | 41.34702 | 13.88266 | 23 | WGI | 10 |
| 71 | Stop 43 - Mortola 2 | 41.34902 | 13.88048 | 31 | WGI | 3 |
| 72 | Stop 44 - Punta Marmolite | 40.89635 | 14.13634 | 64 | BM | 7 |
| 73 | Stop 45 - Acqua Fidia | 40.92923 | 14.70025 | 958 | PPF, GL, USAF, WGI | 3 |
| 74 | Piano Acqua Fidia | 40.92281 | 14.7134 | 804 | WGI | 2 |
| 75 | Cerreto Sannita | 41.31006 | 14.53653 | 246 | WGI | 1 |
| 76 | Stop 46 - Civitella | 41.31012 | 14.5368 | 258 | WGI | 1 |
| 77 | Stop 47 - Procida | 40.76473 | 14.03531 | 0 | BM | 7 |
| 78 | Stop 39 - Verdolino B | 40.85571 | 14.20621 | 145 | PP, LPFU | 80 |
| 79 | Stop 48 - Pianura | 40.85935 | 14.18551 | 195 | PP | 10 |
| 80 | Stop 49 - Vigna S. Martino 1 | 40.84231 | 14.24247 | 76 | PPF, USAF, BM | 8 |
| 81 | Stop 50 - Vigna S. Martino 2 | 40.84301 | 14.24311 | 175 | BM, UPFU | 3 |
| 82 | Stop 51 - Vigna S. Martino 3 | 40.84373 | 14.24292 | 152 | PP | 3 |
| 83 | Stop 52 - Baiano | 40.91548 | 14.66762 | 400 | PPF |  |
| 84 | Stop 53 - Cuma | 40.84895 | 14.05028 | 55 | BM, LPFU | 20 |
| 85 | Stop 54 - Lago Patria | 40.93363 | 14.05399 | 37 | WGI, BM | 5 |
| 86 | Stop 55 - Le Campole | 41.23112 | 14.24032 | 583 | WGI | 1 |
| 87 | Stop 56 - Liberi | 41.22711 | 14.30978 | 421 | WGI | 1 |
| 88 | Stop 57 - Statigliano | 41.27991 | 14.24541 | 275 | WGI | 1 |
| 89 | Stop 58 - Sant'Anna | 40.77986 | 14.65101 | 124 | WGI | 10 |
| 90 | Stop 59 - Paterno Sant'Arcangelo | 40.67639 | 14.64385 | 167 | WGI | 5 |
| 91 | Stop 60 - Polvica | 40.69385 | 14.63513 | 278 | WGI | 4 |
| 92 | Stop 61 - Monticchio | 40.59983 | 14.35433 | 312 | PPF, WGI | 18 |
| 93 | Stop 62 - Piano di Sorrento | 40.6369 | 14.40127 | 18 | WGI, LYT | 25 |
| 94 | Stop 63 - Fosso di Prepezzano | 40.69748 | 14.88704 | 128 | WGI | 3 |
| 95 | Stop 64 - Cologna | 40.72163 | 14.7763 | 154 | WGI | 1 |
| 96 | Stop 65 - Serino Cimitero | 40.86696 | 14.85831 | 365 | PPF, WGI | 1 |
| 97 | Stop 66 - Serino Ferrovia | 40.85697 | 14.85926 | 390 | WGI | 2 |

***Table 2.*** *Data on outcrop locations: ID, site name, latitude, longitude, elevation, units and observed thickness for each outcrop. Abbreviations of the units: PPF Plinian Pumice Fallout, USAF Unconsolidated Stratified Ash Flow, WGI Welded Gray Ignimbrite, LYT Lithified Yellow Tuff, PP Piperno Unit, BM Breccia Museo, LPFU Lower Pumice Flow Unit, UPFU Upper Pumice Flow unit.*

**3. Proximal data**


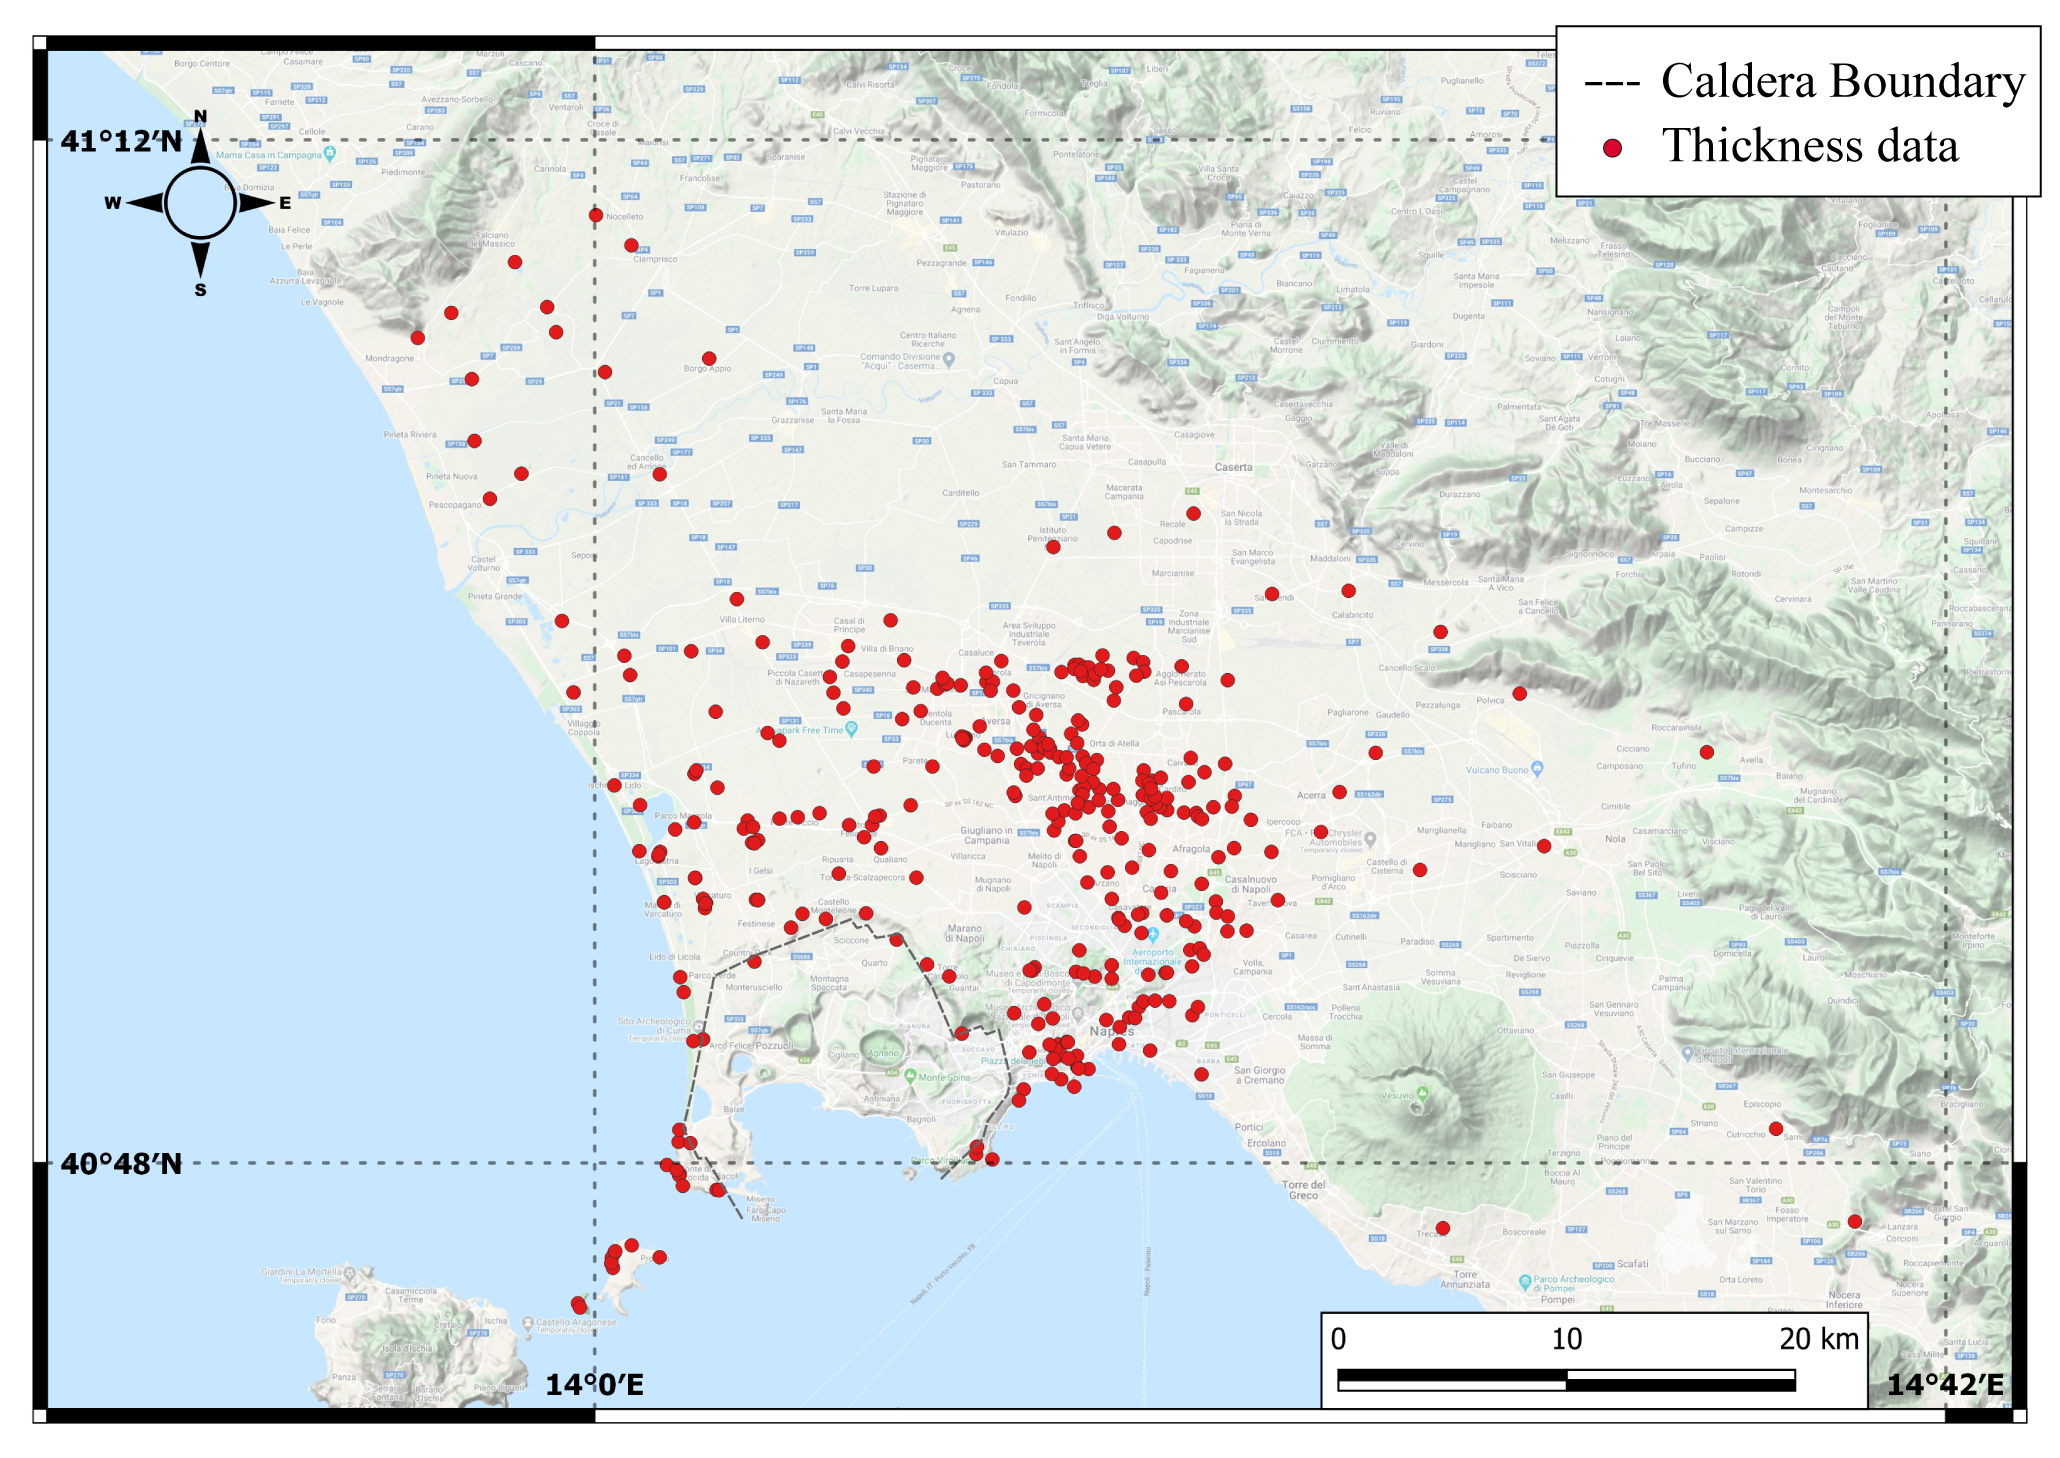


***Figure 2.*** *Proximal thickness data used from literature (Ortolani and Aprile, 1985; Scandone et al., 1991; Bellucci, 1994; Rolandi et al., 2003; Torrente et al., 2010; ISPRA, 2011), consist of boreholes, outcrops and data from geological sections. The isopachs were traced considering also partial proximal isopach maps presented in these works.*

**The enveloped area**


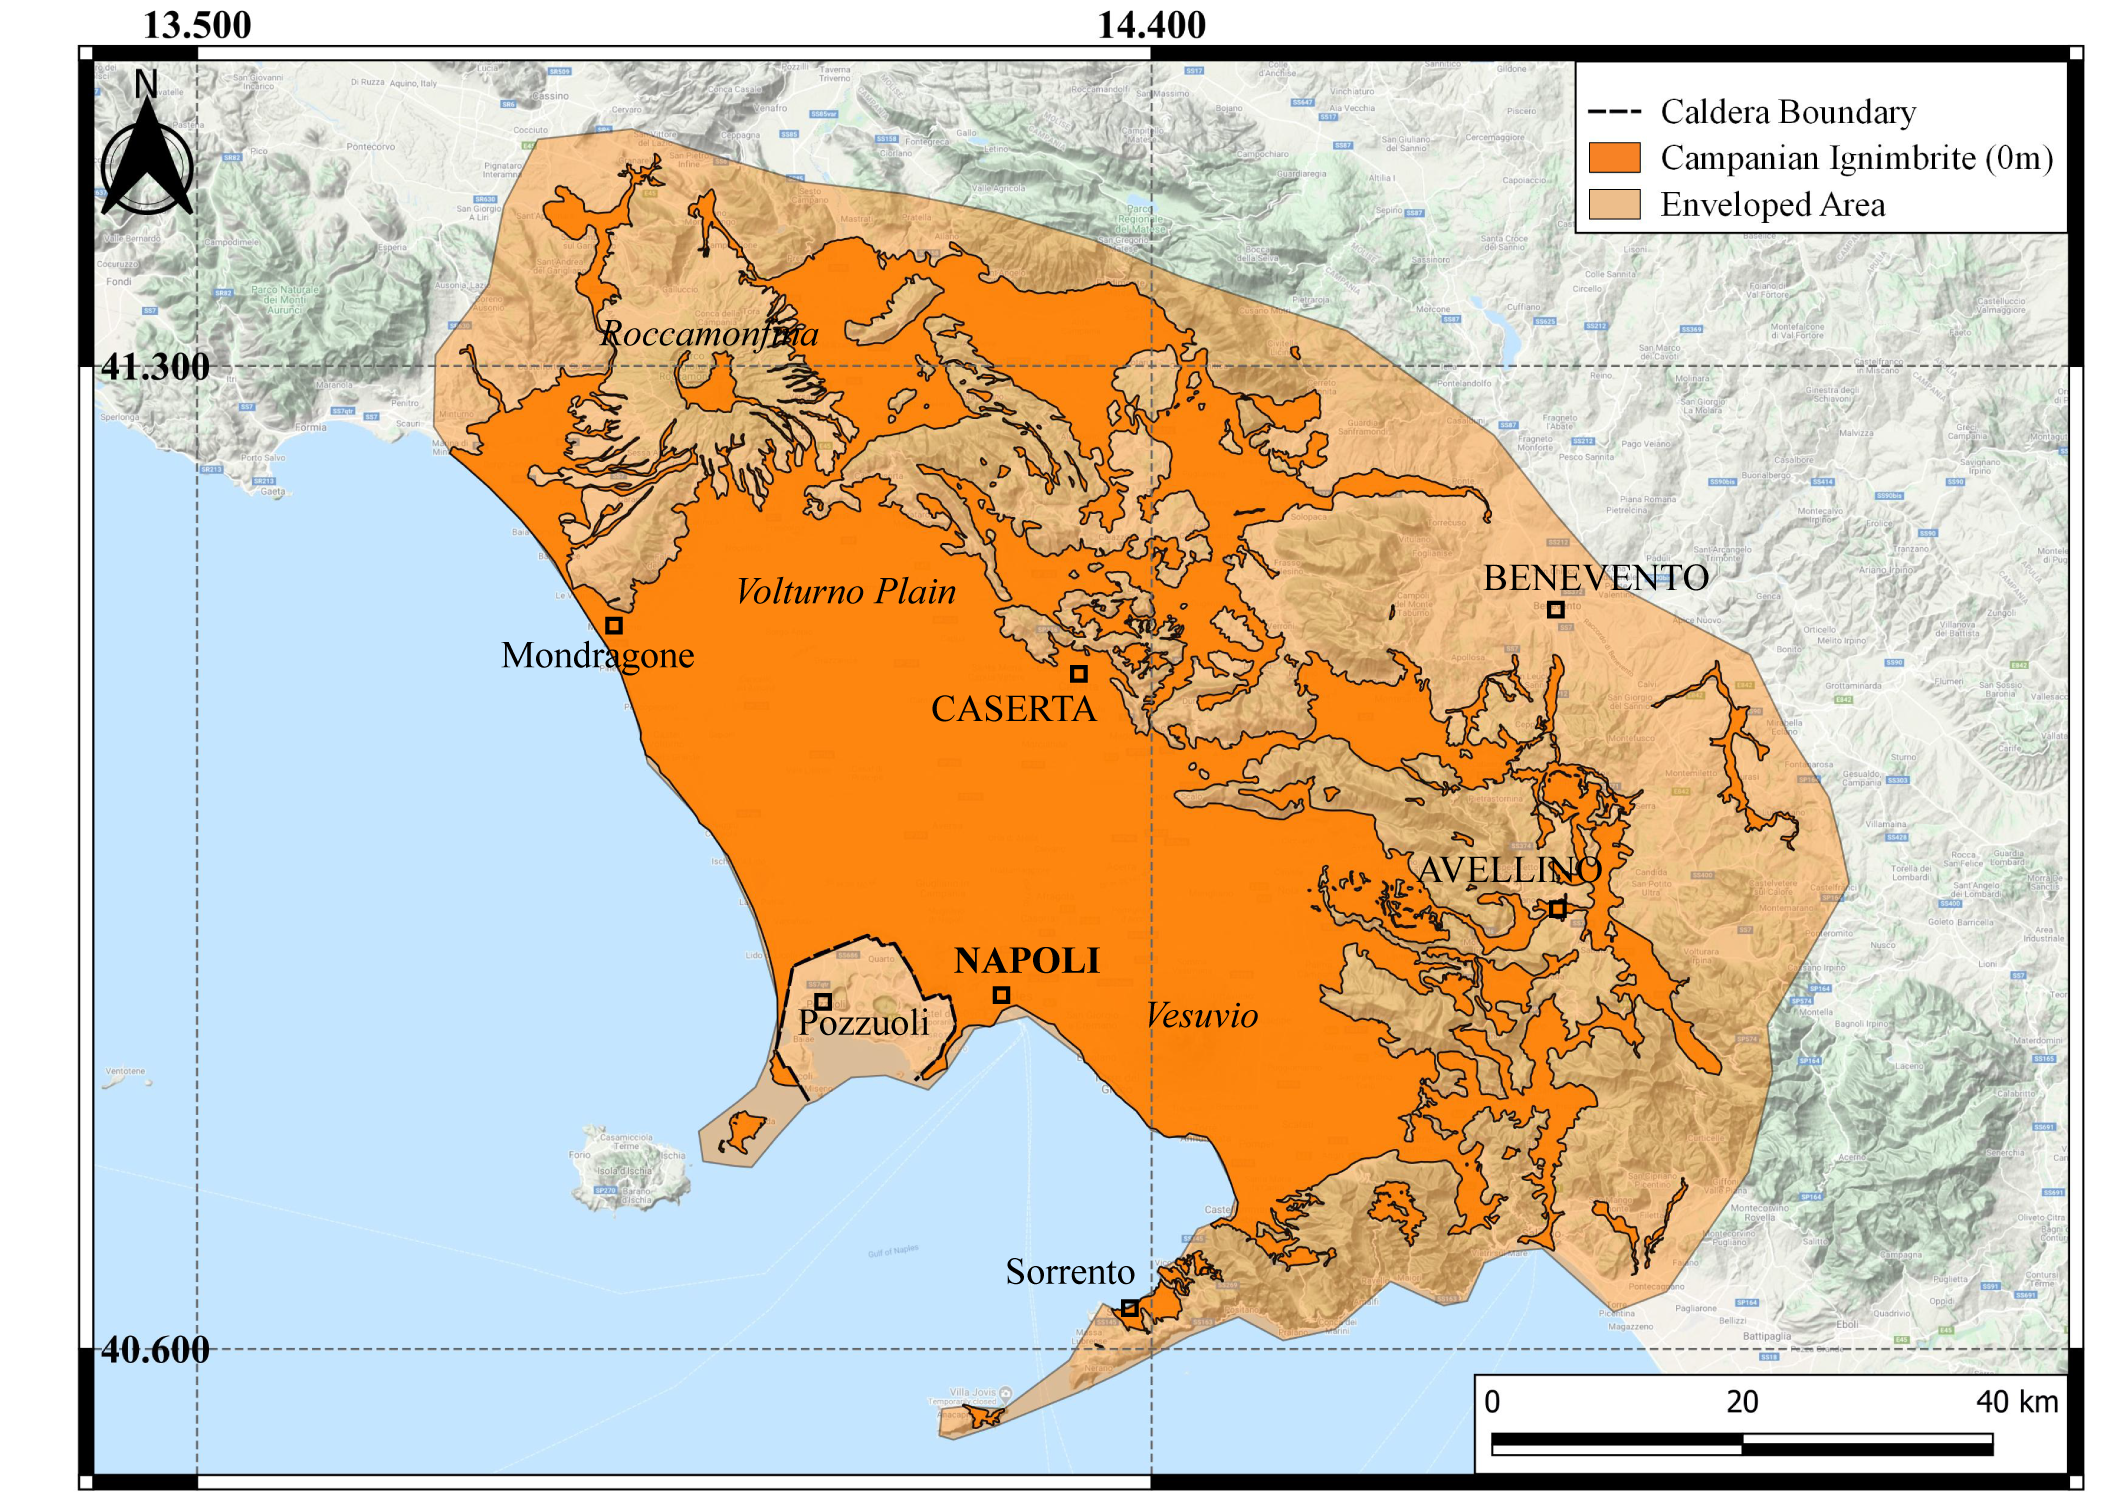


***Figure 3.*** *Reconstruction of the areal extent of the CI PDC deposits, enclosed within the 0-m isopach is shown in dark orange. The total area covered by the preserved deposits of CI is 3,216 km2, the envelopment with a shape is equal to 6,095 km2, which is shown in light orange. The isolated areas from the source are due to the erosion.*

# 4. Density data

Density data used for the DRE volume, are reported in Table 3.

| **Sample** | **Unit** | **ρ bulk (g/cm3)** | **Standard deviation (g/cm3)** | **Total porosity (%)** |
| --- | --- | --- | --- | --- |
| AS01 | WGI | 1.003 | 0.009 | 62 |
| AS07 | WGI | 0.942 | 0.004 | 64 |
| AS09 | WGI | 0.938 | 0.005 | 64 |
| AS10 | WGI | 1.000 | 0.007 | 62 |
| AS13 | WGI | 0.764 | 0.051 | 71 |
| AS14 | WGI | 0.918 | 0.014 | 65 |
| AS16 | WGI | 1.194 | 0.004 | 55 |
| AS21 | WGI | 0.842 | 0.007 | 68 |
| AS24 | USAF-WGI | 0.835 | 0.004 | 68 |
| AS25 | WGI | 0.830 | 0.003 | 68 |
| AS26 | WGI | 0.984 | 0.003 | 62 |
| AS30 | USAF-WGI | 0.799 | 0.005 | 69 |
| AS31 | WGI | 0.888 | 0.002 | 66 |
| AS32 | WGI | 1.000 | 0.011 | 62 |
| AS38 | LYT | 0.830 | 0.014 | 68 |
| AS49 | WGI | 1.064 | 0.005 | 59 |
| AS50 | WGI | 1.088 | 0.002 | 58 |
| AS52 | LYT | 1.151 | 0.019 | 56 |
| AS53 | WGI | 0.925 | 0.013 | 65 |
| AS54 | WGI | 0.987 | 0.003 | 62 |
| AS61 | LYT | 1.060 | 0.010 | 60 |
| AS63 | PIPERNO | 1.283 | 0.001 | 49 |
| AS69 | PIPERNO | 1.275 | 0.008 | 51 |
| AS70 | PIPERNO | 1.302 | 0.002 | 49 |
| AS73 | WGI | 0.816 | 0.003 | 69 |
| AS75 | WGI | 0.959 | 0.005 | 63 |
| ES03 | WGI | 1.008 | 0.014 | 62 |
| ES04 | WGI | 0.843 | 0.057 | 68 |
| ES05 | WGI | 1.050 | 0.010 | 60 |
| ES08 | WGI | 1.155 | 0.011 | 56 |
| ES10 | WGI | 1.330 | 0.003 | 49 |
| ES11 | LYT | 0.885 | 0.021 | 66 |
| ES12 | WGI | 1.047 | 0.003 | 60 |
| ES14 | WGI | 1.063 | 0.004 | 60 |
| ES17 | WGI | 0.999 | 0.014 | 62 |
| ES18 | WGI | 1.080 | 0.012 | 59 |
| ES19 | WGI | 1.002 | 0.023 | 62 |
| ES20 | WGI | 0.745 | 0.015 | 72 |
| ES21 | WGI | 1.074 | 0.019 | 59 |
| ES22 | WGI | 1.153 | 0.006 | 56 |

***Table 3.*** *Values of bulk density (g/cm3), and total porosity (the sum of open and closed porosity) for the analyzed samples. The method is explained in section 4.2. The standard deviation of density is given by the instrument. Samples were taken from all the Campanian Ignimbrite areal distribution and from different units (USAF; Unconsolidated Stratified Ash Flow; WGI: Welded Gray Ignimbrite; LYT: Lithified Yellow Tuff; Piperno).*

# 5. The volume uncertainties

The uncertainties were determined by two different methods, one for the proximal area and one for the distal. In the first case, the proximal isopach map was traced fitting thickness data. In order to avoid subjective interpretation, a second isopach map was delineated tracing isopachs differently, but always consistent with data. A new volume was calculated from this second convincing proximal isopach map. The percentage difference with the first map was estimated (3.06%) corresponding to a volume of 1.7 km3.

The main error in estimating the paleo-valley topography is the extrapolation of the base elevation of the valley itself. For this reason, in the area of Altavilla Irpina, the profiles were modified, and the base elevations were adjusted to reach the maximum difference possible in altitude, always constrained by field data. The volume diverged by 25%, corresponding to a volume of 4.9 km3. The total CI volume uncertainties are 6.6 km3.

*Data related to the location of outcrops and density are also reported in the Repository Data online at* [*https://mfr.osf.io/render?url=https%3A%2F%2Fosf.io%2Fc8nea%2Fdownload*](https://mfr.osf.io/render?url=https%3A%2F%2Fosf.io%2Fc8nea%2Fdownload)*.*

**References**

Aiello, G., Barra, D., Collina, C., Piperno, M., Guidi, A., Stanislao, C. et al. (2018). Geomorphological and paleoenvironmental evolution in the prehistoric framework of the coastland of Mondragone, southern Italy. Quatern. Int. 493, 70-85. doi:10.1016/j.quaint.2018.06.041

Aprile, F., Sbrana, A., and Toccaceli, R. M. (2004). Il ruolo dei depositi piroclastici nell’analisi cronostratigrafica dei terreni quaternari del sottosuolo della Piana Campana (Italia meridionale). Il Quaternario 17, 547-554.

Aprile, F., and Toccaceli, R. M. (2002). Nuove conoscenze sulla stratigrafia e distribuzione dei depositi ignimbritici quaternari nel sottosuolo della piana del Sarno (Salerno-Campania)—Italia meridionale. Il Quaternario 15(2), 2002.

Arienzo, I., Civetta, L., Heumann, A., Wörner, G., and Orsi, G. (2009). Isotopic evidence for open system processes within the Campanian Ignimbrite (Campi Flegrei–Italy) magma chamber. Bull. Volcanol. 71(3), 285. doi:10.1007/s00445-008-0223-0

Arienzo, I., Heumann, A., Wörner, G., Civetta, L., and Orsi, G. (2011). Processes and timescales of magma evolution prior to the Campanian Ignimbrite eruption (Campi Flegrei, Italy). Earth Planet. Sci. Lett. 306 (3-4), 217-228. doi:10.1016/j.epsl.2011.04.002

Barberi, F., Innocenti, F., Lirer, L., Munno, R., Pescatore, T., and Santacroce, R. (1978). The Campanian Ignimbrite: a Major Prehistoric Eruption in the Neapolitan area (Italy). Bull. Volcanol. 41, 10–31. doi:10.1007/BF02597680

Bellucci, F. (1994). Nuove conoscenze stratigrafiche sui depositi vulcanici del sottosuolo del settore meridionale della Piana Campana. Boll. Soc. Geol. It. 113, 395–420.

Cappelletti, P., Cerri, G., Colella, A., de’Gennaro, M., Langella, A., Perrotta, A., et al. (2003). Post-eruptive processes in the Campanian Ignimbrite. Mineral. Petrol. 79, 79–97. doi:10.1007/s00710-003-0003-7

Costanzo, M. R., amd Nunziata, C. (2019). VS models in the historical centre of Naples (Southern Italy) from noise cross-correlation. J. Volcanol. Geoth. Res. 369, 80-94. doi:10.1016/j.jvolgeores.2018.11.014

De Vivo, B., Petrosino, P., Lima, A., Rolandi, G., and Belkin, H. E. (2010). Research progress in volcanology in the Neapolitan area, southern Italy: a review and some alternative views. Mineral. Petrol. 99 (1-2), 1-28. doi:10.1007/s00710-009-0098-6

De Vivo, B., Rolandi, G., Gans, P. B., Calvert, A., Bohrson, W. A., Spera, F. J., et al. (2001). New constraints on the pyroclastic eruptive history of the Campanian volcanic Plain (Italy). Mineral. Petrol. 73, 47–65. doi:10.1007/s007100170010

Fedele, F. G., Giaccio, B., Isaia, R., and Orsi, G. (2002). Ecosystem Impact of the Campanian Ignimbrite Eruption in Late Pleistocene Europe. Quat. Res. 57, 420–424. doi:10.1006/qres.2002.2331

Fedele, L., Scarpati, C., Lanphere, M., Melluso, L., Morra, V., Perrotta, A., et al. (2008). The Breccia Museo formation, Campi Flegrei, southern Italy: geochronology, chemostratigraphy and relationship with the Campanian Ignimbrite eruption. Bull. Volcanol. 70, 1189–1219. doi:10.1007/s00445-008-0197-y

Fedele, L., Scarpati, C., Sparice, D., Perrotta, A., and Laiena, F. (2016). A chemostratigraphic study of the Campanian Ignimbrite eruption (Campi Flegrei, Italy): Insights on magma chamber withdrawal and deposit accumulation as revealed by compositionally zoned stratigraphic and facies framework. J. Volcanol. Geotherm. Res. 324, 105–117. doi:10.1016/j.jvolgeores.2016.05.019

Fowler, S. J., Spera, F. J., Bohrson, W. A., Belkin, H. E., and De Vivo, B. (2007). Phase equilibria constraints on the chemical and physical evolution of the Campanian Ignimbrite. J. Petrol. 48(3), 459-493. doi:10.1093/petrology/egl068

Giaccio, B., Hajdas, I., Peresani, M., Fedele, F. G., and Isaia, R. (2006). "The Campanian Ignimbrite tephra and its relevance for the timing of the middle to upper paleolithic shift", in When Neanderthals and modern humans met, eds N. J. Conard (Tübingen Publications in Prehistory. Tübingen: Kerns Verlag.), 343–375.

Giaccio, B., Isaia, R., Fedele, F. G., Di Canzio, E., Hoffecker, J. F., Ronchitelli, A., et al. (2008). The Campanian Ignimbrite and Codola tephra layers: Two temporal/stratigraphic markers for the Early Upper Palaeolithic in southern Italy and eastern Europe. J. Volcanol. Geotherm. Res. 177, 208–226. doi:10.1016/j.jvolgeores.2007.10.007

Incoronato, A., and Nardi, G. (1987). Contribution of rock magnetic studies to determine depositional mechanism and parameters of the "Campanian Ignimbrite" deposits. Rendiconti Acc. Sc. Fis. Nat. Special Issue, 201-214.

ISPRA (2011). Geological Map n. 446-447 ‘‘Napoli’’; scale 1:50,000. National Geological Survey of Italy, Regione Campania - Settore Difesa Suolo, Napoli, Italy.

Langella, A., Bish, D. L., Calcaterra, D., and Cappelletti, P. (2013). "L’Ignimbrite Campana (IC)", in Le pietre storiche della Campania dall’oblio alla riscoperta, eds M. De Gennaro, D. Calcaterra and A. Langella (Napoli: Luciano Editore), 155–177.

Melluso, L., Morra, V., Perrotta, A., Scarpati, C., and Adabbo, M. (1995). The eruption of the Breccia Museo (Campi Flegrei, Italy): Fractional crystallization processes in a shallow, zoned magma chamber and implications for the eruptive dynamics. J. Volcanol. Geotherm. Res. 68, 325–339. doi:10.1016/0377-0273(95)00020-5

Milia, A., and Torrente, M. M. (2007). The influence of paleogeographic setting and crustal subsidence on the architecture of ignimbrites in the Bay of Naples (Italy). Earth Planet. Sci. Lett. 263, 192–206. doi:10.1016/j.epsl.2007.08.004

Nunziata, C., Natale, M., and Panza, G. F. (2004). Seismic characterization of Neapolitan soils. In Seismic Ground Motion in Large Urban Areas, eds G. F. Panza, I. Paskaleva and C. Nunziata (Basel: Birkhäuser), 1285-1300. doi:10.1007/s00024-003-2492-z

Orsi, G., and Rosi, M. (1991). Large ignimbrite eruptions of the Phlegraean Fields Caldera: the Neapolitan Yellow Tuff and the Campanian Ignimbrite. In Workshop on explosive volcanism, Napoli, September 1-8.

Orsi, G., de Vita, S., and Di Vito, M. A. (1996). The restless, resurgent Campi Flegrei nested caldera (Italy): constraints on its evolution and configuration. J. Volcanol. Geotherm. Res. 74, 179–214. doi:10.1016/S0377-0273(96)00063-7

Ort, M. H., Orsi, G., Pappalardo, L., and Fisher, R. V. (2003). Anisotropy of magnetic susceptibility studies of depositional processes in the Campanian Ignimbrite, Italy. Bull. Volcanol. 65, 55–72. doi:10.1007/s00445-002-0241-2

Ortolani, F., and Aprile, F. (1985). Principali caratteristiche stratigrafiche e strutturali dei depositi superficiali della piana campana. Boll. Soc. Geol. It. 104, 195–206.

Pappalardo, L., Civetta, L., De Vita, S., Di Vito, M., Orsi, G., Carandente, A., et al. (2002). Timing of magma extraction during the Campanian Ignimbrite eruption (Campi Flegrei Caldera). J. Volcanol. Geotherm. Res. 114(3-4), 479-497. doi:10.1016/S0377-0273(01)00302-X

Pappalardo, L., Ottolini, L., and Mastrolorenzo, G. (2008). The Campanian Ignimbrite (southern Italy) geochemical zoning: Insight on the generation of a super-eruption from catastrophic differentiation and fast withdrawal. Contrib. Mineral. Petrol. 156, 1–26. doi:10.1007/s00410-007-0270-0

Perrotta, A., Scarpati, C., Luongo, G., and Morra, V. (2006). Chapter 5 The Campi Flegrei caldera boundary in the city of Naples. In Developments in Volcanology, eds B. De Vivo (Elsevier), 9, 85–96. doi:10.1016/S1871-644X(06)80019-7.

Perrotta, A., Scarpati, C., Luongo, G., and Morra, V. (2010). Stratigraphy and volcanological evolution of the southwestern sector of Campi Flegrei and Procida Island, Italy. Geol. Soc. Am. Spec. Pap. 464, 171–191. doi:10.1130/2010.2464(09)

Rolandi, G., Bellucci, F., Heizler, M. T., Belkin, H. E., and De Vivo, B. (2003). Tectonic controls on the genesis of ignimbrites from the Campanian Volcanic Zone, southern Italy. Mineral. Petrol. 79, 3–31. doi:10.1007/s00710-003-0014-4

Rosi, M., and Sbrana, A. (1987). Phlegrean Fields. CNR, Quad. La Ricerca Sci. 114, 1–175.

Rosi, M., Sbrana, A., and Vezzoli, L. (1988). Correlazioni tefrostratigrafiche di alcuni livelli di Ischia, Procida e Campi Flegrei. Mem. della Soc. Geol. Ital. 41, 1015–1027.

Rosi, M., Vezzoli, L., Aleotti, P., and Censi, M. (1996). Interaction between caldera collapse and eruptive dynamics during the Campanian Ignimbrite eruption, Phlegraean Fields, Italy. Bull. Volcanol. 57, 541–554. doi:10.1007/BF00304438

Scandone, R., Bellucci, F., Lirer, L., and Rolandi, G. (1991). The structure of the Campanian Plain and the activity of the Neapolitan volcanoes (Italy). J. Volcanol. Geotherm. Res. 48, 1–31. doi:10.1016/0377-0273(91)90030-4

Scarpati, C., and Perrotta, A. (2016). Stratigraphy and physical parameters of the Plinian phase of the Campanian Ignimbrite eruption. Bull. Geol. Soc. Am. 128, 1147–1159. doi:10.1130/B31331.1

Signorelli, S., Vaggelli, G., Francalanci, L., and Rosi, M. (1999). Origin of magmas feeding the Plinian phase of the Campanian Ignimbrite eruption, Phlegrean Fields (Italy): constraints based on matrix-glass and glass-inclusion compositions. J. Volcanol. Geotherm. Res. 91(2-4), 199-220. doi:10.1016/S0377-0273(99)00036-0

Smith, V. C., Isaia, R., Engwell, S., and Albert, P. G. (2016). Tephra dispersal during the Campanian Ignimbrite (Italy) eruption: implications for ultra-distal ash transport during the large caldera-forming eruption. Bull. Volcanol. 78, 45. doi:10.1007/s00445-016-1037-0

Sparice, D. (2015). Definizione delle litofacies e ricostruzione dell’architettura dell’Ignimbrite Campana. [doctoral dissertation/PhD thesis]. [Naples (IT)]: University of Naples Federico II.

Torrente, M. M., Milia, A., Bellucci, F., and Rolandi, G. (2010). Extensional tectonics in the Campania Volcanic Zone (Eastern Tyrrhenian Sea, Italy): New insights into the relationship between faulting and ignimbrite eruptions. Boll. Soc. Geol. It. 129, 297–315. doi:10.3301/IJG.2010.07
